# Supplementary material for: Staphylococcus aureus Breast Implant Infection Isolates Display Recalcitrance To Antibiotic Pocket Irrigants
Source: PubMed Central journal article supplement (PMC9927092; doi:10.1128/spectrum.02884-22), 2022-12-12

## Supplemental Material

**Table S1. MBCs of antibiotics tested against *S. aureus* and *P. aeruginosa* strains**

|      | MBC(ug/mL) |           |            | TAPI        |
|------|------------|-----------|------------|-------------|
|      | Gentamicin | Cefazolin | Bacitracin |             |
| JE2  | 1          | 6         | >32        | Susceptible |
| 117  | 1          | 0.5       | >32        | Susceptible |
| 158  | 1          | 1         | >32        | Susceptible |
| PA01 | 6          | >32       | >1400      | Susceptible |
| 157  | 4          | >32       | >1400      | Susceptible |
| 160  | 6          | >32       | >1400      | Susceptible |

**Table S2. Antimicrobial Resistance Genes Annotated in BIAI Isolates**

| Strain | ST Type | Genes                      | Resistance Category                                                   |
|--------|---------|----------------------------|-----------------------------------------------------------------------|
| JE2    | 8       | mecA                       | penam                                                                 |
|        |         | mecR1                      | penam                                                                 |
|        |         | tet(38)                    | tetracycline                                                          |
|        |         | mepR                       | glycylcycline;tetracycline                                            |
|        |         | mepA                       | glycylcycline;tetracycline                                            |
|        |         | mgrA                       | acridine_dye;cephalosporin;fluoroquinolone;penam;peptide;tetracycline |
|        |         | Staphylococcus_aureus_norA | fluoroquinolone                                                       |
|        |         | arlS                       | acridine_dye;fluoroquinolone                                          |
|        |         | arlR                       | acridine_dye;fluoroquinolone                                          |
|        |         | Staphylococcus_aureus_LmrS | aminoglycoside;diaminopyrimidine;macrolide;oxazolidinone;phenicol     |
|        |         | Staphylococcus_aureus_FosB | fosfomycin                                                            |
| 117    | 39      | arlR                       | acridine_dye; fluoroquinolone                                         |
|        |         | arlS                       | acridine_dye; fluoroquinolone                                         |
|        |         | mgrA                       | acridine_dye; cephalosporin;                                          |

|      |     |                              |                                                                                                                                                                                                           |
|------|-----|------------------------------|-----------------------------------------------------------------------------------------------------------------------------------------------------------------------------------------------------------|
|      |     |                              | fluoroquinolone; penam; peptide; tetracycline                                                                                                                                                             |
|      |     | mepA                         | glycylcycline; tetracycline                                                                                                                                                                               |
|      |     | mepR                         | glycylcycline; tetracycline                                                                                                                                                                               |
|      |     | tet(38)                      | tetracycline                                                                                                                                                                                              |
|      |     | FosB                         | fosfomicin                                                                                                                                                                                                |
| 158  | 45  | mgrA                         | acridine_dye; cephalosporin; fluoroquinolone; penam; peptide; tetracycline                                                                                                                                |
|      |     | arlS                         | acridine_dye; fluoroquinolone                                                                                                                                                                             |
|      |     | arlR                         | acridine_dye; fluoroquinolone                                                                                                                                                                             |
|      |     | mepA                         | glycylcycline; tetracycline                                                                                                                                                                               |
|      |     | mepR                         | glycylcycline; tetracycline                                                                                                                                                                               |
|      |     | tet(38)                      | Tetracycline                                                                                                                                                                                              |
|      |     | PC1_beta-lactamase_(blaZ)    | Penam                                                                                                                                                                                                     |
|      |     | msrA                         | lincosamide; macrolide; oxazolidinone; phenicol; pleuromutilin; streptogramin; tetracycline                                                                                                               |
|      |     | mphC                         | macrolide                                                                                                                                                                                                 |
| PAO1 | 549 | TriA                         | triclosan                                                                                                                                                                                                 |
|      |     | TriB                         | triclosan                                                                                                                                                                                                 |
|      |     | TriC                         | triclosan                                                                                                                                                                                                 |
|      |     | MexA                         | aminocoumarin; carbapenem; cephalosporin; cephamycin; diaminopyrimidine; fluoroquinolone; macrolide; monobactam; penam; penem; peptide; phenicol; sulfonamide; tetracycline                               |
|      |     | MexB                         | aminocoumarin; carbapenem; cephalosporin; cephamycin; diaminopyrimidine; fluoroquinolone; macrolide; monobactam; penam; penem; peptide; phenicol; sulfonamide; tetracycline                               |
|      |     | OprM                         | acridine_dye; aminocoumarin; aminoglycoside; carbapenem; cephalosporin; cephamycin; diaminopyrimidine; fluoroquinolone; macrolide; monobactam; penam; penem; peptide; phenicol; sulfonamide; tetracycline |
|      |     | Pseudomonas_aeruginosa_catB7 | phenicol                                                                                                                                                                                                  |
|      |     | fosA                         | fosfomicin                                                                                                                                                                                                |
|      |     | PmpM                         | aminoglycoside; benzalkonium_chloride; fluoroquinolone                                                                                                                                                    |
|      |     | mexM                         | phenicol                                                                                                                                                                                                  |
|      |     | mexN                         | phenicol                                                                                                                                                                                                  |
|      |     | mexY                         | acridine_dye; aminoglycoside; carbapenem; cephalosporin; cephamycin; fluoroquinolone; macrolide; penam; phenicol; tetracycline                                                                            |
|      |     | mexX                         | acridine_dye; aminoglycoside; carbapenem; cephalosporin; cephamycin; fluoroquinolone; macrolide; penam; phenicol; tetracycline                                                                            |
|      |     | Pseudomonas_aeruginosa_soxR  | acridine_dye; cephalosporin; fluoroquinolone; glycylcycline; penam; phenicol; rifamycin; tetracycline; triclosan                                                                                          |
|      |     | MexE                         | diaminopyrimidine; fluoroquinolone; phenicol                                                                                                                                                              |

|                             |                                                                                                                                                                               |
|-----------------------------|-------------------------------------------------------------------------------------------------------------------------------------------------------------------------------|
| MexF                        | diaminopyrimidine;fluoroquinolone;phenicol                                                                                                                                    |
| OprN                        | diaminopyrimidine;fluoroquinolone;phenicol                                                                                                                                    |
| OpmB                        | aminocoumarin;macrolide;monobactam;tetracycline                                                                                                                               |
| MuxC                        | aminocoumarin;macrolide;monobactam;tetracycline                                                                                                                               |
| MuxB                        | aminocoumarin;macrolide;monobactam;tetracycline                                                                                                                               |
| MuxA                        | aminocoumarin;macrolide;monobactam;tetracycline                                                                                                                               |
| Pseudomonas_aeruginosa_CpxR | aminocoumarin;aminoglycoside;carbapenem;cephalosporin;cephamycin;diaminopyrimidine;fluoroquinolone;macrolide;monobactam;penam;penem;peptide;phenicol;sulfonamide;tetracycline |
| opmE                        | acridine_dye;carbapenem;diaminopyrimidine;macrolide;phenicol;tetracycline                                                                                                     |
| mexQ                        | acridine_dye;carbapenem;diaminopyrimidine;macrolide;phenicol;tetracycline                                                                                                     |
| mexP                        | acridine_dye;carbapenem;diaminopyrimidine;macrolide;phenicol;tetracycline                                                                                                     |
| arnA                        | peptide                                                                                                                                                                       |
| mexK                        | macrolide;tetracycline;triclosan                                                                                                                                              |
| mexJ                        | macrolide;tetracycline;triclosan                                                                                                                                              |
| mexL                        | macrolide;tetracycline;triclosan                                                                                                                                              |
| ArmR                        | aminocoumarin;carbapenem;cephalosporin;cephamycin;diaminopyrimidine;fluoroquinolone;macrolide;monobactam;penam;penem;peptide;phenicol;sulfonamide;tetracycline                |
| PDC-1                       | carbapenem;cephalosporin;monobactam                                                                                                                                           |
| APH(3')-IIb                 | aminoglycoside                                                                                                                                                                |
| bcr-1                       | bicyclomycin                                                                                                                                                                  |
| mexG                        | acridine_dye;fluoroquinolone;tetracycline                                                                                                                                     |
| mexH                        | acridine_dye;fluoroquinolone;tetracycline                                                                                                                                     |
| mexI                        | acridine_dye;fluoroquinolone;tetracycline                                                                                                                                     |
| opmD                        | acridine_dye;fluoroquinolone;tetracycline                                                                                                                                     |
| mexV                        | acridine_dye;fluoroquinolone;macrolide;phenicol;tetracycline                                                                                                                  |
| mexW                        | acridine_dye;fluoroquinolone;macrolide;phenicol;tetracycline                                                                                                                  |
| OprJ                        | aminocoumarin;aminoglycoside;cephalosporin;diaminopyrimidine;fluoroquinolone;macrolide;penam;phenicol;tetracycline                                                            |
| MexD                        | aminocoumarin;aminoglycoside;cephalosporin;diaminopyrimidine;fluoroquinolone;macrolide;penam;phenicol;tetracycline                                                            |
| MexC                        | aminocoumarin;aminoglycoside;cephalosporin;diaminopyrimidine;fluoroquinolone;macrolide;penam;phenicol;tetracycline                                                            |
| basS                        | peptide                                                                                                                                                                       |

|     |     |                             |                                                                                                                                                                               |
|-----|-----|-----------------------------|-------------------------------------------------------------------------------------------------------------------------------------------------------------------------------|
|     |     | OpmH                        | triclosan                                                                                                                                                                     |
|     |     | Pseudomonas_aeruginosa_emrE | aminoglycoside                                                                                                                                                                |
|     |     | OXA-50                      | cephalosporin;penam                                                                                                                                                           |
| 157 | 633 | MexC                        | aminocoumarin; aminoglycoside; cephalosporin; diaminopyrimidine; fluoroquinolone; macrolide; penam; phenicol; tetracycline                                                    |
|     |     | MexD                        | aminocoumarin; aminoglycoside; cephalosporin; diaminopyrimidine; fluoroquinolone; macrolide; penam; phenicol; tetracycline                                                    |
|     |     | OprJ                        | aminocoumarin; aminoglycoside; cephalosporin; diaminopyrimidine; fluoroquinolone; macrolide; penam; phenicol; tetracycline                                                    |
|     |     | CrpP                        | fluoroquinolone                                                                                                                                                               |
|     |     | mexW                        | acridine_dye;fluoroquinolone;macrolide;phenicol;tetracycline                                                                                                                  |
|     |     | mexV                        | acridine_dye;fluoroquinolone;macrolide;phenicol;tetracycline                                                                                                                  |
|     |     | arnA                        | peptide                                                                                                                                                                       |
|     |     | mexP                        | acridine_dye;carbapenem;diaminopyrimidine;macrolide;phenicol;tetracycline                                                                                                     |
|     |     | mexQ                        | acridine_dye;carbapenem;diaminopyrimidine;macrolide;phenicol;tetracycline                                                                                                     |
|     |     | opmE                        | acridine_dye;carbapenem;diaminopyrimidine;macrolide;phenicol;tetracycline                                                                                                     |
|     |     | Pseudomonas_aeruginosa_CpxR | aminocoumarin;aminoglycoside;carbapenem;cephalosporin;cephamycin;diaminopyrimidine;fluoroquinolone;macrolide;monobactam;penam;penem;peptide;phenicol;sulfonamide;tetracycline |
|     |     | MuxA                        | aminocoumarin;macrolide;monobactam;tetracycline                                                                                                                               |
|     |     | MuxB                        | aminocoumarin;macrolide;monobactam;tetracycline                                                                                                                               |
|     |     | MuxC                        | aminocoumarin;macrolide;monobactam;tetracycline                                                                                                                               |
|     |     | OpmB                        | aminocoumarin;macrolide;monobactam;tetracycline                                                                                                                               |
|     |     | OprN                        | diaminopyrimidine;fluoroquinolone;phenicol                                                                                                                                    |
|     |     | MexF                        | diaminopyrimidine;fluoroquinolone;phenicol                                                                                                                                    |
|     |     | MexE                        | diaminopyrimidine;fluoroquinolone;phenicol                                                                                                                                    |
|     |     | Pseudomonas_aeruginosa_soxR | acridine_dye;cephalosporin;fluoroquinolone;glycylcycline;penam;phenicol;rifamycin;tetracycline;triclosan                                                                      |
|     |     | mexX                        | acridine_dye;aminoglycoside;carbapenem;cephalosporin;cephamycin;fluoroquinolone;macrolide;penam;phenicol;tetracycline                                                         |
|     |     | mexY                        | acridine_dye;aminoglycoside;carbapenem;cephalosporin;cephamycin;fluoroquinolone;macrolide;penam;phenicol;tetracycline                                                         |
|     |     | mexN                        | phenicol                                                                                                                                                                      |
|     |     | mexM                        | phenicol                                                                                                                                                                      |

|     |     |                              |                                                                                                                                                                                                          |
|-----|-----|------------------------------|----------------------------------------------------------------------------------------------------------------------------------------------------------------------------------------------------------|
|     |     | PmpM                         | aminoglycoside;benzalkonium_chloride;fluoroquinolone                                                                                                                                                     |
|     |     | fosA                         | fosfomycin                                                                                                                                                                                               |
|     |     | Pseudomonas_aeruginosa_catB7 | phenicol                                                                                                                                                                                                 |
|     |     | mexK                         | macrolide; tetracycline; triclosan                                                                                                                                                                       |
|     |     | mexJ                         | macrolide; tetracycline; triclosan                                                                                                                                                                       |
|     |     | mexL                         | macrolide; tetracycline; triclosan                                                                                                                                                                       |
|     |     | ArmR                         | aminocoumarin; carbapenem; cephalosporin; cephamycin; diaminopyrimidine; fluoroquinolone; macrolide; monobactam; penam;penem; peptide;phenicol; sulfonamide; tetracycline                                |
|     |     | PDC-3                        | carbapenem; cephalosporin; monobactam                                                                                                                                                                    |
|     |     | APH(3')-IIb                  | aminoglycoside                                                                                                                                                                                           |
|     |     | bcr-1                        | bicyclomycin                                                                                                                                                                                             |
|     |     | mexG                         | acridine_dye; fluoroquinolone; tetracycline                                                                                                                                                              |
|     |     | mexH                         | acridine_dye; fluoroquinolone; tetracycline                                                                                                                                                              |
|     |     | mexI                         | acridine_dye; fluoroquinolone; tetracycline                                                                                                                                                              |
|     |     | opmD                         | acridine_dye; fluoroquinolone; tetracycline                                                                                                                                                              |
|     |     | OprM                         | acridine_dye; aminocoumarin; aminoglycoside; carbapenem; cephalosporin; cephamycin; diaminopyrimidine; fluoroquinolone; macrolide; monobactam; penam;penem; peptide; phenicol; sulfonamide; tetracycline |
|     |     | MexB                         | aminocoumarin; carbapenem; cephalosporin; cephamycin; diaminopyrimidine; fluoroquinolone; macrolide; monobactam; penam;penem; peptide; phenicol; sulfonamide; tetracycline                               |
|     |     | MexA                         | aminocoumarin; carbapenem; cephalosporin; cephamycin; diaminopyrimidine; fluoroquinolone; macrolide; monobactam; penam;penem; peptide; phenicol; sulfonamide; tetracycline                               |
|     |     | TriC                         | triclosan                                                                                                                                                                                                |
|     |     | TriB                         | triclosan                                                                                                                                                                                                |
|     |     | TriA                         | triclosan                                                                                                                                                                                                |
|     |     | OXA-486                      | cephalosporin;penam                                                                                                                                                                                      |
|     |     | Pseudomonas_aeruginosa_emrE  | aminoglycoside                                                                                                                                                                                           |
|     |     | OpmH                         | triclosan                                                                                                                                                                                                |
|     |     | basS                         | peptide                                                                                                                                                                                                  |
| 160 | 633 | mexK                         | macrolide;tetracycline;triclosan                                                                                                                                                                         |
|     |     | mexJ                         | macrolide;tetracycline;triclosan                                                                                                                                                                         |
|     |     | mexL                         | macrolide;tetracycline;triclosan                                                                                                                                                                         |
|     |     | ArmR                         | aminocoumarin;carbapenem;cephalosporin;cephamycin; diaminopyrimidine;fluoroquinolone;macrolide;monobact am;penam;penem;peptide;phenicol;sulfonamide;tetracycline                                         |
|     |     | PDC-3                        | carbapenem;cephalosporin;monobactam                                                                                                                                                                      |

|                             |                                                                                                                                                                                            |
|-----------------------------|--------------------------------------------------------------------------------------------------------------------------------------------------------------------------------------------|
| APH(3')-IIb                 | aminoglycoside                                                                                                                                                                             |
| bcr-1                       | bicyclomycin                                                                                                                                                                               |
| mexG                        | acridine_dye;fluoroquinolone;tetracycline                                                                                                                                                  |
| mexH                        | acridine_dye;fluoroquinolone;tetracycline                                                                                                                                                  |
| mexI                        | acridine_dye;fluoroquinolone;tetracycline                                                                                                                                                  |
| opmD                        | acridine_dye;fluoroquinolone;tetracycline                                                                                                                                                  |
| OprM                        | acridine_dye;aminocoumarin;aminoglycoside;carbapenem;cephalosporin;cephamycin;diaminopyrimidine;fluoroquinolone;macrolide;monobactam;penam;penem;peptide;phenicol;sulfonamide;tetracycline |
| MexB                        | aminocoumarin;carbapenem;cephalosporin;cephamycin;diaminopyrimidine;fluoroquinolone;macrolide;monobactam;penam;penem;peptide;phenicol;sulfonamide;tetracycline                             |
| MexA                        | aminocoumarin;carbapenem;cephalosporin;cephamycin;diaminopyrimidine;fluoroquinolone;macrolide;monobactam;penam;penem;peptide;phenicol;sulfonamide;tetracycline                             |
| TriC                        | triclosan                                                                                                                                                                                  |
| TriB                        | triclosan                                                                                                                                                                                  |
| TriA                        | triclosan                                                                                                                                                                                  |
| OXA-486                     | cephalosporin;penam                                                                                                                                                                        |
| Pseudomonas_aeruginosa_emrE | aminoglycoside                                                                                                                                                                             |
| OpmH                        | triclosan                                                                                                                                                                                  |
| basS                        | peptide                                                                                                                                                                                    |
| MexC                        | aminocoumarin;aminoglycoside;cephalosporin;diaminopyrimidine;fluoroquinolone;macrolide;penam;phenicol;tetracycline                                                                         |
| MexD                        | aminocoumarin;aminoglycoside;cephalosporin;diaminopyrimidine;fluoroquinolone;macrolide;penam;phenicol;tetracycline                                                                         |
| OprJ                        | aminocoumarin;aminoglycoside;cephalosporin;diaminopyrimidine;fluoroquinolone;macrolide;penam;phenicol;tetracycline                                                                         |
| CrpP                        | fluoroquinolone                                                                                                                                                                            |
| mexW                        | acridine_dye;fluoroquinolone;macrolide;phenicol;tetracycline                                                                                                                               |
| mexV                        | acridine_dye;fluoroquinolone;macrolide;phenicol;tetracycline                                                                                                                               |
| arnA                        | peptide                                                                                                                                                                                    |
| mexP                        | acridine_dye;carbapenem;diaminopyrimidine;macrolide;phenicol;tetracycline                                                                                                                  |
| mexQ                        | acridine_dye;carbapenem;diaminopyrimidine;macrolide;phenicol;tetracycline                                                                                                                  |

|  |                              |                                                                                                                                                                               |
|--|------------------------------|-------------------------------------------------------------------------------------------------------------------------------------------------------------------------------|
|  | opmE                         | acridine_dye;carbapenem;diaminopyrimidine;macrolide;phenicol;tetracycline                                                                                                     |
|  | Pseudomonas_aeruginosa_CpxR  | aminocoumarin;aminoglycoside;carbapenem;cephalosporin;cephamycin;diaminopyrimidine;fluoroquinolone;macrolide;monobactam;penam;penem;peptide;phenicol;sulfonamide;tetracycline |
|  | MuxA                         | aminocoumarin;macrolide;monobactam;tetracycline                                                                                                                               |
|  | MuxB                         | aminocoumarin;macrolide;monobactam;tetracycline                                                                                                                               |
|  | MuxC                         | aminocoumarin;macrolide;monobactam;tetracycline                                                                                                                               |
|  | OpmB                         | aminocoumarin;macrolide;monobactam;tetracycline                                                                                                                               |
|  | OprN                         | diaminopyrimidine;fluoroquinolone;phenicol                                                                                                                                    |
|  | MexF                         | diaminopyrimidine;fluoroquinolone;phenicol                                                                                                                                    |
|  | MexE                         | diaminopyrimidine;fluoroquinolone;phenicol                                                                                                                                    |
|  | Pseudomonas_aeruginosa_soxR  | acridine_dye;cephalosporin;fluoroquinolone;glycylcycline;penam;phenicol;rifamycin;tetracycline;triclosan                                                                      |
|  | mexX                         | acridine_dye;aminoglycoside;carbapenem;cephalosporin;cephamycin;fluoroquinolone;macrolide;penam;phenicol;tetracycline                                                         |
|  | mexY                         | acridine_dye;aminoglycoside;carbapenem;cephalosporin;cephamycin;fluoroquinolone;macrolide;penam;phenicol;tetracycline                                                         |
|  | mexN                         | phenicol                                                                                                                                                                      |
|  | mexM                         | phenicol                                                                                                                                                                      |
|  | PmpM                         | aminoglycoside;benzalkonium chloride;fluoroquinolone                                                                                                                          |
|  | fosA                         | fosfomicin                                                                                                                                                                    |
|  | Pseudomonas_aeruginosa_catB7 | phenicol                                                                                                                                                                      |
|  |                              |                                                                                                                                                                               |

Figure S1. Shared Virulence Factors Among the *Staphylococcus aureus* strains.

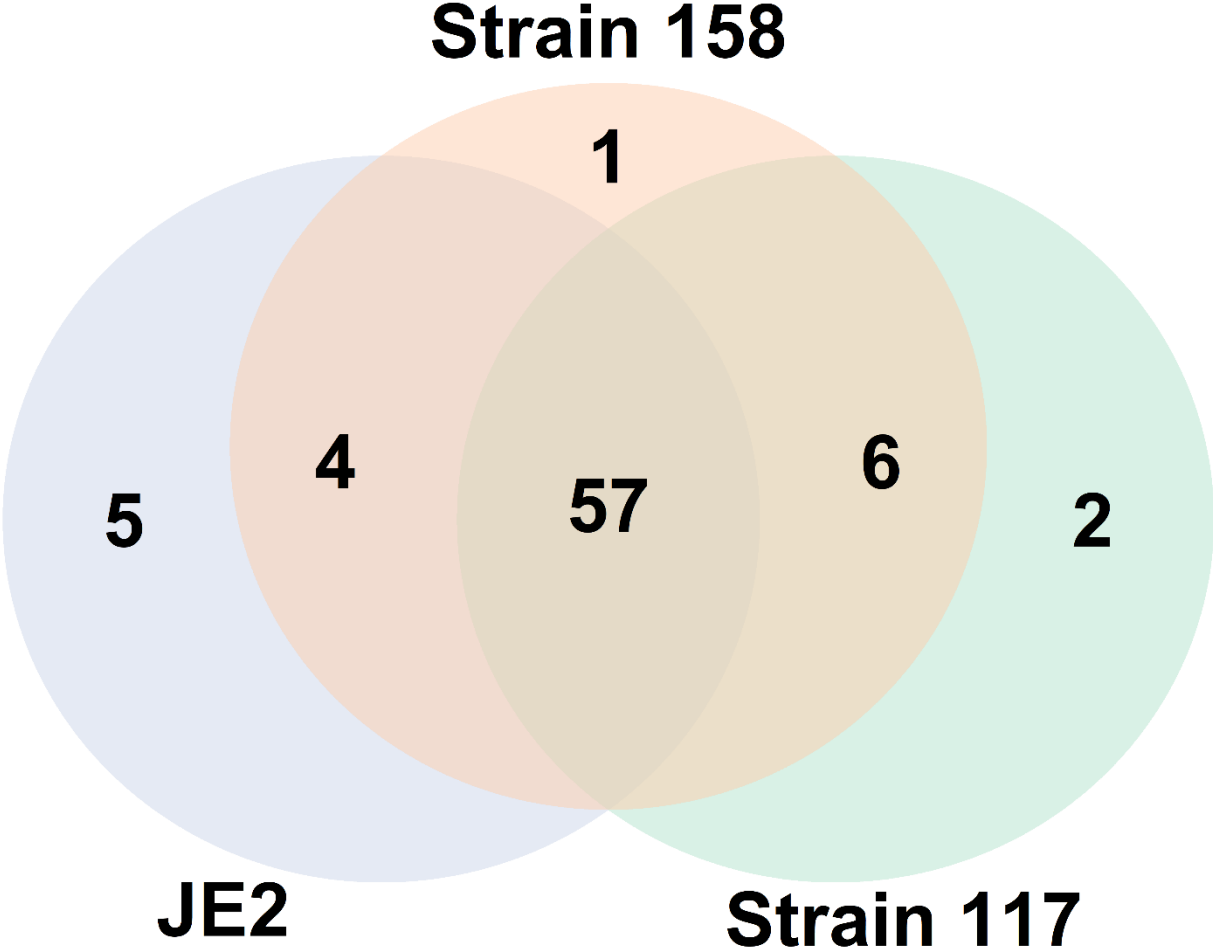

Supplement: spectrum.02884-22-s0001.pdf [file spectrum.02884-22-s0001.pdf]
